# Supplementary material
Source: Springer Nature journal article supplement (https://www.springermedizin.de/resource/supplementary/13014_2013_1015_MOESM2_ESM.pdf/9635020)

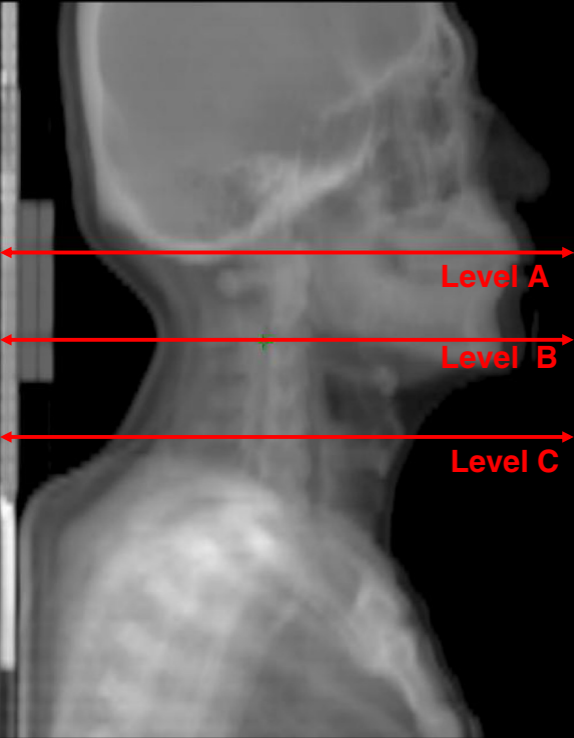

**Level A**

**Level B**

**Level C**

Supplement: MOESM2 [file 9635020]
